# Supplementary material
Source: PubMed Central journal article supplement (PMC7049927)
Supplement: rccm.201903-0670OC_urman_data_supplement.pdf [file rccm.201903-0670OC_urman_data_supplement.pdf]

**THE POTENTIAL EFFECTS OF POLICY-DRIVEN AIR POLLUTION  
INTERVENTIONS ON CHILDHOOD LUNG DEVELOPMENT**

Robert Urman, PhD; Erika Garcia, PhD; Kiros Berhane, PhD; Rob McConnell, MD; W.  
James Gauderman, PhD, Frank Gilliland, MD, PhD

Online Data Supplement

Table E1: Averaged NO<sub>2</sub> concentrations (in ppb) that were observed and used in hypothetical intervention scenarios by community and cohort

| Community  | Cohort | Observed concentrations | Scenario 1              | Scenario 2    |               |               | Scenario 3          |                     |
|------------|--------|-------------------------|-------------------------|---------------|---------------|---------------|---------------------|---------------------|
|            |        |                         | Remained at 1993 levels | 10% reduction | 20% reduction | 30% reduction | Threshold at 30 ppb | Threshold at 20 ppb |
| Long Beach | 1993   | 34.4                    | 34.4                    | 31.0          | 27.5          | 24.1          | 30.0                | 20.0                |
|            | 1996   | 32.9                    | 34.4                    | 29.6          | 26.3          | 23.0          | 30.0                | 20.0                |
|            | 2002   | 20.3                    | 34.4                    | 18.3          | 16.2          | 14.2          | 20.3                | 20.0                |
| Mira Loma  | 1993   | 23.3                    | 23.3                    | 21.0          | 18.6          | 16.3          | 23.3                | 20.0                |
|            | 1996   | 25.3                    | 23.3                    | 22.8          | 20.2          | 17.7          | 25.3                | 20.0                |
|            | 2002   | 16.7                    | 23.3                    | 15.0          | 13.4          | 11.7          | 16.7                | 16.7                |
| Riverside  | 1993   | 24.7                    | 24.7                    | 22.2          | 19.8          | 17.3          | 24.7                | 20.0                |
|            | 1996   | 25.7                    | 24.7                    | 23.1          | 20.5          | 18.0          | 25.7                | 20.0                |
|            | 2002   | 21.4                    | 24.7                    | 19.3          | 17.1          | 15.0          | 21.4                | 20.0                |
| San Dimas  | 1993   | 36.6                    | 36.6                    | 32.9          | 29.3          | 25.6          | 30.0                | 20.0                |
|            | 1996   | 32.4                    | 36.6                    | 29.1          | 25.9          | 22.6          | 30.0                | 20.0                |
|            | 2002   | 21.5                    | 36.6                    | 19.3          | 17.2          | 15.0          | 21.5                | 20.0                |
| Upland     | 1993   | 39.4                    | 39.4                    | 35.4          | 31.5          | 27.6          | 30.0                | 20.0                |
|            | 1996   | 36.2                    | 39.4                    | 32.6          | 28.9          | 25.3          | 30.0                | 20.0                |
|            | 2002   | 23.4                    | 39.4                    | 21.0          | 18.7          | 16.4          | 23.4                | 20.0                |

Table E2: Averaged PM<sub>2.5</sub> concentrations (in µg/m<sup>3</sup>) that were observed and used in hypothetical intervention scenarios by community and cohort

| Community  | Cohort | Observed concentrations | Scenario 1              | Scenario 2    |               |               | Scenario 3                        |                                   |
|------------|--------|-------------------------|-------------------------|---------------|---------------|---------------|-----------------------------------|-----------------------------------|
|            |        |                         | Remained at 1993 levels | 10% reduction | 20% reduction | 30% reduction | Threshold at 30 µg/m <sup>3</sup> | Threshold at 20 µg/m <sup>3</sup> |
| Long Beach | 1993   | 21.3                    | 21.3                    | 19.1          | 17.0          | 14.9          | 15.0                              | 12.0                              |
|            | 1996   | 19.7                    | 21.3                    | 17.7          | 15.7          | 13.8          | 15.0                              | 12.0                              |
|            | 2002   | 13.0                    | 21.3                    | 11.7          | 10.4          | 9.1           | 13.0                              | 12.0                              |
| Mira Loma  | 1993   | 31.5                    | 31.5                    | 28.3          | 25.2          | 22.0          | 15.0                              | 12.0                              |
|            | 1996   | 27.6                    | 31.5                    | 24.9          | 22.1          | 19.3          | 15.0                              | 12.0                              |
|            | 2002   | 17.8                    | 31.5                    | 16.1          | 14.3          | 12.5          | 15.0                              | 12.0                              |
| Riverside  | 1993   | 29.3                    | 29.3                    | 26.4          | 23.4          | 20.5          | 15.0                              | 12.0                              |
|            | 1996   | 25.7                    | 29.3                    | 23.1          | 20.6          | 18.0          | 15.0                              | 12.0                              |
|            | 2002   | 13.1                    | 29.3                    | 11.8          | 10.5          | 9.2           | 13.1                              | 12.0                              |
| San Dimas  | 1993   | 24.5                    | 24.5                    | 22.0          | 19.6          | 17.1          | 15.0                              | 12.0                              |
|            | 1996   | 19.6                    | 24.5                    | 17.7          | 15.7          | 13.7          | 15.0                              | 12.0                              |
|            | 2002   | 11.9                    | 24.5                    | 10.7          | 9.5           | 8.3           | 11.9                              | 11.9                              |
| Upland     | 1993   | 28.7                    | 28.7                    | 25.9          | 23.0          | 20.1          | 15.0                              | 12.0                              |
|            | 1996   | 23.8                    | 28.7                    | 21.4          | 19.0          | 16.7          | 15.0                              | 12.0                              |
|            | 2002   | 16.1                    | 28.7                    | 14.5          | 12.9          | 11.3          | 15.0                              | 12.0                              |

Table E3: Number of communities exceeding United States Environmental Protection Agency standard, World Health Organization standard, and hypothetical thresholds used in the g-computation analyses

| Standards/thresholds    | Number of community-cohorts exceeding standards/thresholds |
|-------------------------|------------------------------------------------------------|
| <u>NO<sub>2</sub></u>   |                                                            |
| 53ppb *                 | 0/15 (0%)                                                  |
| 30ppb ‡                 | 6/15 (40%)                                                 |
| 21ppb †                 | 13/15 (87%)                                                |
| 20ppb ‡                 | 14/15 (93%)                                                |
| <u>PM<sub>2.5</sub></u> |                                                            |
| 15µg/m <sup>3</sup> ‡   | 12/15 (80%)                                                |
| 12 µg/m <sup>3</sup> *‡ | 14/15 (93%)                                                |
| 10 µg/m <sup>3</sup> †  | 15/15 (100%)                                               |

\* United States Environmental Protection Agency standard.

† World Health Organization standard.

‡ Thresholds used in the g-computation analysis.
